# Supplementary material
Source: publisher figshare collection journal article supplement (https://geolsoc.figshare.com/ndownloader/files/5425094)
Supplement: Supplementary file 1 [file 5425094]

Online Appendix 2 - International reference materials JB-1A and BIR-1 repeatedly analysed during the course of the study
	STANDARD RUNS							STANDARD RUNS
	JB-1A							BIR-1
	1	2	3	4	5			1	2	3	4
SiO2	52.32	52.68	52.10	52.61	52.31		SiO2	47.67	46.13	47.51	47.99
TiO2	1.28	1.29	1.25	1.29	1.30		TiO2	0.94	0.96	0.95	0.95
Al2O3	14.01	14.56	14.34	14.50	14.84		Al2O3	15.41	14.97	15.11	15.07
Fe2O3(t)	9.10	9.15	9.13	9.11	8.66		Fe2O3(t)	11.17	11.36	11.67	11.05
MnO	0.14	0.14	0.14	0.14	0.14		MnO	0.17	0.17	0.17	0.17
MgO	7.92	7.91	8.30	7.65	7.94		MgO	9.64	9.69	9.48	9.40
CaO	9.54	9.42	9.54	9.17	9.20		CaO	13.24	13.90	13.03	12.71
Na2O	2.68	2.71	2.67	2.77	2.69		Na2O	1.72	2.25	1.77	1.80
K2O	1.32	1.33	1.39	1.42	1.42		K2O	0.02	0.03	0.04	0.02
P2O5	0.26	0.27	0.24	0.27	0.26		P2O5	0.02	0.12	0.04	0.02
Sc	27.6	27.9	27.8	27.7	26.1		Sc	44.4	46.4	41.5	39.7
V	201.9	197.1	214.4	210.8	205.0		V	320.5	306.3	330.6	312.9
Cr	425.1	431.1	421.3	429.7	418.0		Cr	399.3	397.5	388.0	375.8
Co	38.9	38.8	36.6	38.7	36.8		Co	52.9	50.2	50.6	49.6
Ni	197.2	140.9	145.2	137.1	138.9		Ni	173.4	167.6	160.7	180.3
Ga	17.6	18.3	17.6	18.0	17.9		Ga	15.2	15.3	14.6	15.1
Rb	43.5	40.3	39.9	36.9	41.5		Rb	0.3	0.3	0.2	0.2
Sr	441.4	452.0	439.6	447.9	441.3		Sr	105.1	109.6	105.3	100.9
Y	24.0	24.6	24.2	25.1	24.0		Y	15.7	16.5	15.8	15.6
Zr	142.5	143.6	146.3	146.0	148.4		Zr	16.2	15.6	15.3	16.7
Nb	27.98	28.02	27.24	28.06	27.57		Nb	0.59	0.61	0.46	0.58
Ba	482.5	508.2	501.6	487.9	490.3		Ba	14.5	57.6	2.4	7.8
Hf	3.41	3.52	3.43	3.44	3.52		Hf	0.54	0.58	0.55	0.53
Ta	1.69	1.71	1.71	1.68	1.70		Ta	0.04	0.04	0.03	0.04
Th	8.94	9.04	8.84	8.77	8.67		Th	0.05	0.09	0.08	0.06
U	1.59	1.72	1.67	1.68	1.68		U	0.02	0.02	0.01	0.02
La	37.50	38.87	37.41	37.62	37.19		La	0.63	0.67	0.48	0.64
Ce	63.95	66.78	63.19	65.86	66.39		Ce	1.89	1.88	1.96	1.97
Pr	7.11	7.20	7.12	7.06	7.06		Pr	0.35	0.37	0.34	0.38
Nd	25.57	27.40	25.56	25.30	26.43		Nd	2.50	2.35	2.08	2.38
Sm	4.97	5.30	4.99	5.03	5.07		Sm	1.08	1.09	0.98	1.06
Eu	1.48	1.65	1.47	1.49	1.48		Eu	0.54	0.52	0.52	0.49
Gd	4.58	4.86	4.71	4.64	4.67		Gd	1.79	1.69	1.75	1.64
Tb	0.67	0.71	0.68	0.71	0.69		Tb	0.36	0.33	0.33	0.33
Dy	3.93	4.26	3.97	4.10	4.05		Dy	2.54	2.46	2.46	2.42
Ho	0.72	0.73	0.72	0.74	0.74		Ho	0.57	0.51	0.54	0.51
Er	2.07	2.20	2.08	2.08	2.10		Er	1.68	1.55	1.64	1.55
Tm	0.32	0.33	0.32	0.33	0.32		Tm	0.26	0.25	0.24	0.25
Yb	2.07	2.12	2.06	2.07	2.10		Yb	1.64	1.63	1.63	1.62
Lu	0.32	0.33	0.32	0.32	0.32		Lu	0.27	0.26	0.26	0.26
